# Supplementary material
Source: publisher figshare collection journal article supplement (https://gsajournals.figshare.com/ndownloader/files/26897822)
Supplement: Supplementary file 1 [file 26897822]

**APPENDIX S3.** Results of the molecular dating analysis for selected nodes using BEAST2.

| **Node of interest** | **combined dataset** | | |
| --- | --- | --- | --- |
| **Age estimate *** | **95% HPD *** | **PP** |
| Malvaceae *s.l.* stem age | 152.89 | (94.63-207.8) | 0.65 |
| Malvaceae *s.l.* crown age (= /Byttneriina and /Malvadendrina stem ages) | 110.47 | (86.14-143.98) | 1 |
| /Helicteroideae stem age | 92.66 | (79.04-112.45) | 1 |
| /Sterculioideae stem age | 83.69 | (74.67-100.27) | 1 |
| /Malvatheca stem age (= /Brownlowioideae- /Dombeyoideae- /Tilioideae stem age) | 79.56 | (71.89-95.11) | 1 |
| /Brownlowioideae stem age | 72.05 | (70.34-74.62) | 1 |
| /Malvatheca crown age (= /Bombacoideae and /Malvoideae stem ages) | 71.67 | (64.34-83.24) | 1 |
| /Tilioideae and /Dombeyoideae stem ages | 70.36 | (70-71.53) | 1 |
| /Bytneriina crown age (= /Bytnerioideae and /Grewioideae stem ages) | 65.67 | (65-67.9) | 1 |

Notes: * Values in the table presented in millions of years ago.HPD: Highest Posterior Density Interval; PP: Posterior Probability value for that node.
